# Supplementary material for: Expression patterns of cell wall-modifying genes from banana during fruit ripening and in relationship with finger drop
Source: PubMed Central journal article supplement — J Exp Bot. 2009 Apr 8;60(7):2021–34. doi: 10.1093/jxb/erp079 (PMC2682500; doi:10.1093/jxb/erp079), 2009-04-08
Supplement: erp079_1.pdf [file erp079_1.pdf]

# **Expression patterns of cell wall modifying genes from banana during fruit ripening and in relationship with finger drop**

Mbéguié-A-Mbéguié D., Hubert O., Baurens F.C., Matsumoto T., Chillet M., Fils-Lycaon B., Sidibé-Bocs S.

**Supplementary Data**

**Table S1:** Sequences of primers used in this study

| Target         | Name                      | Oligonucleotide sequence 5'→ 3'    | Product size (bp) | Reference                                                  |
|----------------|---------------------------|------------------------------------|-------------------|------------------------------------------------------------|
|                | dT <sub>17</sub> -adapter | GACTCGAGTCGACATCGA-T <sub>17</sub> |                   | Frohman (1990)                                             |
|                | Adapter                   | GACTCGAGTCGACATCGA                 |                   |                                                            |
|                | Xth-F1                    | CAYGAYGARATIGAYTTYGARTT            |                   | This study                                                 |
| <i>αMaEXP1</i> | EXP1-SPF                  | GGTGGAGGCATTCGGTCTGGTT             | 221               |                                                            |
|                | EXP1-SPR                  | GGGAGGTGACACGATGAGAAGATGG          |                   |                                                            |
| <i>αMaEXP2</i> | EXP2-SPF                  | GCAGAGCAACGCGTACCTCACT             | 165               |                                                            |
|                | EXP2-SPR                  | GAGAAGAGGTTCGAACAGCGCGA            |                   |                                                            |
| <i>αMaEXP3</i> | EXP3-SPF                  | GGAAGTGGGGTCAGAAGTGGCA             | 187               | Trivedi <i>et al.</i> , 2004,<br>Sane <i>et al.</i> , 2007 |
|                | EXP3-SPR                  | GGCGGAAGGAGTTTGAGCTTG              |                   |                                                            |
| <i>αMaEXP4</i> | EXP4-SPF                  | TCGGCCAATCCCTCTCCTTCCG             | 150               |                                                            |
|                | EXP4-SPR                  | AGAGTGGAGCAGCATTTCGAGTTGCAGT       |                   |                                                            |
| <i>αMaEXP5</i> | EXP5-SPF                  | GCGGTGCGACAATGGCAGTAGA             | 208               |                                                            |
|                | EXP5-SPR                  | GCAGCCACTTCAGCCTCTGCTA             |                   |                                                            |
| <i>MaPG1</i>   | PG1-SPF                   | TCTTCATTCTTTCTTTTTCTGC             | 150               |                                                            |
|                | PG1-SPR                   | TTAGTATGCAGCCAAATTAGATCC           |                   |                                                            |
| <i>MaPG1/2</i> | PG1/2SPF                  | TCATTACAGCATTGAAGGGAAA             | 131               |                                                            |
|                | PG1/2SPR                  | GTCAAGTTATTTGGGGTGCATT             |                   | Asif <i>et al.</i> , 2005                                  |
| <i>MaPG3</i>   | PG3-SPF                   | GAGCCTGGGTATGCACAACT               | 132               |                                                            |
|                | PG3-SPR                   | GTACACCGTGTCTGAAGCTGAT             |                   |                                                            |
| <i>MaPG4</i>   | PG4-SPF                   | GTATTGGAAGCTTAGGAAAGCAG            | 150               |                                                            |
|                | PG4-SPR                   | ACGGTGTCCATGCGTATGTT               |                   |                                                            |
| <i>MaPEL1</i>  | PEL1-SPF                  | TGCTCATTTCTTTCTTTTCACG             | 153               |                                                            |
|                | PEL1-SPR                  | TCCCAAGTCAAGTAGTATCAACACA          |                   | Pua <i>et al.</i> , 2001                                   |
| <i>MaPEL2</i>  | PEL2-SPF                  | GGAAGCGTTGTCAAGTTTCTTTT            | 177               |                                                            |
|                | PEL2-SPR                  | GGATAACGGGCAAAAGACTAAA             |                   |                                                            |
| <i>MaXET1</i>  | XET1-SPF                  | CGGAGTGCTCCATTGCCTGAGAGAA          | 153               |                                                            |
|                | XET1-SPR                  | AGCCGATGTGTGCTTTTCAATTGGTTGT       |                   | Lu <i>et al.</i> , 2004                                    |
| <i>MaXET2</i>  | XET2-SPF                  | GGAATGCTTCGCCGCATCTAAG             | 188               |                                                            |
|                | XET2-SPR                  | TCACATCCAATACAATTCTTCTTATCGCA      |                   |                                                            |
| <i>MaXTH3</i>  | XTH3-SPF                  | GACAGGATGAGGTGGGTGCAGAAGA          | 222               |                                                            |
|                | XTH3-SPR                  | TGCTAATCCGGTAGACGCAGAACAGA         |                   |                                                            |
| <i>MaXTH4</i>  | XTH4-SPF                  | CGACTGATGGCTGCTGGAT                | 101               |                                                            |
|                | XTH4-SPR                  | TCCATCTTTTACATACAAAACGGAACT        |                   |                                                            |
| <i>MaXTH5</i>  | XTH5-SPF                  | CACATTCGGGACTGCGATTACGTC           | 247               |                                                            |
|                | XTH5-SPR                  | CTTCGAACACCAATCCCCGATGCTC          |                   |                                                            |
| <i>MaXTH6</i>  | XTH6-SPF                  | TGCTACGACCAGCATCGATATGGCA          | 167               | This study                                                 |
|                | XTH6-SPR                  | GATGGTTGATCGTCGACGGCACTTG          |                   |                                                            |
| <i>MaXTH7</i>  | XTH7-SPF                  | ACAGAGGATGAAGTGGGTGCAGAGG          | 114               |                                                            |
|                | XTH7-SPR                  | CTCTGTCTCTCAGGCGATGGAGC            |                   |                                                            |
| <i>MaXTH8</i>  | XTH8-SPF                  | TACAACACTGCAACGACGCCAAGC           | 204               |                                                            |
|                | XTH8-SPR                  | CCTGAGAACA TGGTTTGCAGGTT           |                   |                                                            |
| <i>MaXTH9</i>  | XTH9-SPF                  | CGCAGAAGA ACTACATGATCTACAAC        | 196               |                                                            |
|                | XTH9-SPR                  | CAGAGAGACTAGTATATTGCTTGTTCG        |                   |                                                            |
| <i>MaPME1</i>  | PME1-SPF                  | CTTTTACCGCAGGGTTGAACTAAG           | 125               | This study                                                 |
|                | PME1-SPR                  | GAAGAAACGTTTTATTCCACACATC          |                   |                                                            |
| <i>MaPME2</i>  | PME2-SPF                  | CGTGGAGCATTTTCATCCAGGGCAAC         | 185               |                                                            |

|               |          |                            |     |                            |
|---------------|----------|----------------------------|-----|----------------------------|
| <i>MaPME3</i> | PME2-SPR | ACTGCAATGCTTACAACCTGGGCACG | 180 | Liu <i>et al.</i> , (1997) |
|               | PME3-SPF | ATTCTGGGGGATAACTGGCTGCCTC  |     |                            |
|               | PME3-SPR | CCCGATGCCTCCACAATTGAATCCC  |     |                            |
| <i>MaACT</i>  | Act-F    | GAGAAGATACAGTGTCTGGA       | 231 | Liu <i>et al.</i> , (1997) |
|               | Act-R    | ATTACCATCGAAATATTTAAAAG    |     |                            |

---

**Table S2**

| Name              | Consensus  | MA-PME2 promoter    | MA-PME3 promoter                                  | Function                                                                                       |
|-------------------|------------|---------------------|---------------------------------------------------|------------------------------------------------------------------------------------------------|
| TATABox           | TATA       | -30                 | -31                                               | Basal promoter elements for transcription                                                      |
| CAATBOX1          | CAAT       | -451                | -484                                              |                                                                                                |
| CURECORECR        | GTAC       | -                   | -457, -601, -800, -879                            | Copper/O <sub>2</sub> -response element                                                        |
| MYBGAHV           | TAACAAA    | -429                | -                                                 | Gibberellin related element                                                                    |
| CAREOSREP1        | CAACTC     | -                   | -129, -285                                        |                                                                                                |
| GARE2OSREP1       | TAACGTA    | -1155               |                                                   |                                                                                                |
| SURECOREATSULTR11 | GAGAC      | -531                | -                                                 | Sulfur responsive element containing the auxin response factor (ARF) binding sequence (GAGACA) |
| POLLENILELAT52    | AGAAA      | -611, -787          | -753                                              | Pollen specific expression                                                                     |
| WBOXATNPR1        | TTGACC     | -1080, -1091        | -561, -942                                        | Plant defense responsiveness                                                                   |
| ARFAT             | TGTCTC     | -1347               | -688                                              | Auxin responsive factor                                                                        |
| ACGTATERD1        | ACGTA      | -362                | -727                                              | Early response to dehydration                                                                  |
| CATATGGMSAUR      | CATATG     | -117                | -968                                              | Auxin related element                                                                          |
| TCA-element       | CCATCTTTTT | -206                | -619                                              | Cis-acting element involved in salicylic acid responsiveness                                   |
| WBOXNTERF3        | TGACY      | -1081, -1092, -1324 | -263, -542, -563, -713, -944, -1009, -1061, -1102 | Wounded related element through ethylene response factor 3                                     |

### Different cis-regulatory elements found within the promoter of MaPME2 and 3 genomic sequences.

Analysis of *MaPME2* and three promoter sequences was performed using PLACE (Prestridge 1991; Higo *et al.*, 1999) and PLANT CARE (Lescot *et al.*, 2002) programs. These numerous cis-regulatory sequences might be involved in tissue-specific or developmentally-regulated gene expression. Some of them are present in common in both *Ma-PME2* and *MaPME3* promoter sequences, including the basal TATA- and CAAT-box promoter elements for transcription, pollen-specific expression, plant-defense response element, auxin, gibberellin and salicylic-acid response elements. Other motifs like the sulphur-response element that contains the auxin–response factor (ARF) binding sequence (GAGACA) and the copper/O<sub>2</sub>-reponse element appeared to be specific to *Ma-PME2* and *MaPME3* promoter sequences, respectively.

## FIGURE S1

```

MA-XET1 -----MAMRFLLVACSLVAIASAGNFYQEFDVTWGGDRAKNDNGQLLTLSLDKASGSG
MA-XET2 MGHTTILSLAFFILALVAFAGARPANFLQDFRITWAGTHIKQLQGGSAIQMLDPSSGCF
MA-XTH3 -----
MA-XTH4 -----
MA-XTH5 -----
MA-XTH6 -----
MA-XTH7 -----
MA-XTH8 -----
MA-XTH9 -----

                                DEIDFEFLG
MA-XET1 FQSKNQYLFQKIDMQIKLVPGNAGTVAAYLSSQGPTHDEIDFEFLGNPSGDPPYTLHTN
MA-XET2 ASNKQYHYGRVSMKIKLIPGDSAGTVAFYMNSDTDAVRDELDFEFLGNRSGQRTRSKTF
MA-XTH3 -----HDEMDFEFLGNLTGDPYTLHTN
MA-XTH4 -----HDEMDFEFLGNTSGEPYVLHTN
MA-XTH5 -----HDEMDFEFLGNVRGKDWRIQTN
MA-XTH6 -----HDEMDFEFLGNVRGKDWRIQTN
MA-XTH7 -----HDEMDFEFLGNLSGDPYTLHTN
MA-XTH8 -----HDEMDFEFLGNLSGDPYALHTN
MA-XTH9 -----HDEMDFEFLGNLSGDPYTLHTN

                                NxS
                                T
MA-XET1 VFTQKGKGNR--EMQFKLWFDPTEDFHTYSILWNPRHVI-----
MA-XET2 TFT-GRATR--EQRVNLWFDPAADYHTYTILWDHYHV-----
MA-XTH3 VYTQKGKGNR--EMQFKLWFDPTKDFHAYSVLWNPRHVMVFLSNPHQRCRRCSPSV--RHR
MA-XTH4 VFAQGKGR--EQQFYLWFDPTLAFHTYSVLWNPRRIV-----
MA-XTH5 VYGNGSTARGREERYLVPFDPTAAHRYSILWTPDYII-----
MA-XTH6 VYGNGSTTRGREERYLVPFDPTTEPHRYSILWTPDYII-----
MA-XTH7 VFTQKGKGNR--EMQFKLWFDPTKDFHTYSILWNPRHVMCVFHSICCLLSFHYSYAHHESV
MA-XTH8 VFTQKGKGNR--EMQFKLWFDPTEDFHTYSILWNPRHVMLDDELVTRCRNSP-----WVL
MA-XTH9 VFTQKGKGNR--EMQFKLWFDPTKDFHTYSILWNPRHI-----

MA-XET1 --FMVDG--TPIRDFKNLESRGIAFPNSQPMRIYSSLWNADDWATRGGLVKTDWSKAPFT
MA-XET2 --FSVDD--VPIRVYKNNEGRGIPYP-VQPMGVYSTLWEGDDWATRGGLVKTDWSKAPFY
MA-XTH3 CSFMVDG--TPIRDFKNLESRGIPFPKNQPMRIYSSLWNADDWATRGGLVKTWNNNAPFT
MA-XTH4 --FYVDG--TPVRFVFNSEGAGVAYPKSQAMRVYASLWDADDWATRGGLVKTDWSQAPFV
MA-XTH5 --FYVDD--VAIREVVRSDSMGGDFP-SKPMSVYATIWDGSSWATSYGKIKINYKYAPYV
MA-XTH6 --FYIDD--VPIREVVRSDAMGGDFP-SKPMSVYATIWDGSSWATSYGRIKINYKYAPYV
MA-XTH7 STFQLHGGRHANRLQEPGVEGHRVQEPPAHEDLLQPLECRRLGDQRRAGEDRLVQGAHV
MA-XTH8 RWFQLHGRRHSHQRLQEPGIEGHRLQEPTHEDLLQPLERQLGDQRRAGEDGLEQGTLR
MA-XTH9 --FMVDG--TPIRDFKNLESRGIAFPKNQPMRIYSSLWNAEDWATRGGLIKTDWTKAPFV

MA-XET1 ASYRNFKADTCVPSSATTECASNSVPSN----GWWNQELDSMGQQRMKWVQKNYMIYN
MA-XET2 AYYKDFDIEGCAVPGPANCASNPNN-----WEGSAYRQLSPEQARKYRWVRANHMIYD
MA-XTH3 ASYRNFNADACVWSSGISSSCAPRNSSAVPAAARGWWSQELDTPSQDRMRWVQKNYMIYH
MA-XTH4 ASYRGFVADACVAASVRPSCSASKA-----GWWQGLDSSGARKLKWVRDNMYVDY
MA-XTH5 SEFSDLVLRGCRVD-PIQQVDTAERCAETVEELMSADFALLTPMKRAAMRRFRERYMIYS
MA-XTH6 SEFSDLVLRGCRVG-PIQQVDSADRCAEAVEELMSADYALLTPRKRAAMRRFRERYTIYS
MA-XTH7 GVVQRLQG-----
MA-XTH8 RLLQELQRRRLRPGKLQVRRLHQERVVEPGARLDQPEDEMGEELHDLQLLQRRQAVSS
MA-XTH9 ASYRNFNANACIKASGRSSCTPAKS-----GWWNQELDSASHARMRWAQKNYMIYN

MA-XET1 YCSDLKRFSQGLPPECSIA-----
MA-XET2 YCTDKPRYPVPPPECFAGI-----
MA-XTH3 YCTDLKRFPQGFPECSMT-----
MA-XTH4 YCRDAKRFPGGFPPECSQPLD-----
MA-XTH5 FCYDQHRYGNFTFPDCDYVSPEHTRFGEWGNNRFPPKEVRRSRRRVRKPSPISVQSSE
MA-XTH6 FCYDQHRYGNVTFPDCDYVSSEHSRFGEWGNKFPPKEVRRARRRSRKPSAVDDQPSK
MA-XTH7 -----
MA-XTH8 GPAAGVRHCLNGRSRLK-----
MA-XTH9 YCNDVNRFPQGLPPECSIA-----

```

### Multiple sequence alignment of polypeptide sequences of banana *XTH* genes

The predicted polypeptide of banana *MaXET1* (accession n° EF103137) and *MaXET2* (accession n° EF103136) genes, and those corresponding to *MaXTH* cDNAs isolated in this study were aligned (2A) using the CLUSTAL X program (Thompson *et al.*, 1997). The putative active site conserved among glycosyl hydrolase family 16 (GH16) enzymes with the adjacent *N*-linked glycosylation site are indicated in bold.
